# Supplementary material
Source: PubMed Central journal article supplement (PMC4197573)
Supplement: supp_dev.105270_DEV105270.pdf [file supp_dev.105270_DEV105270.pdf]

## Supplementary Figures

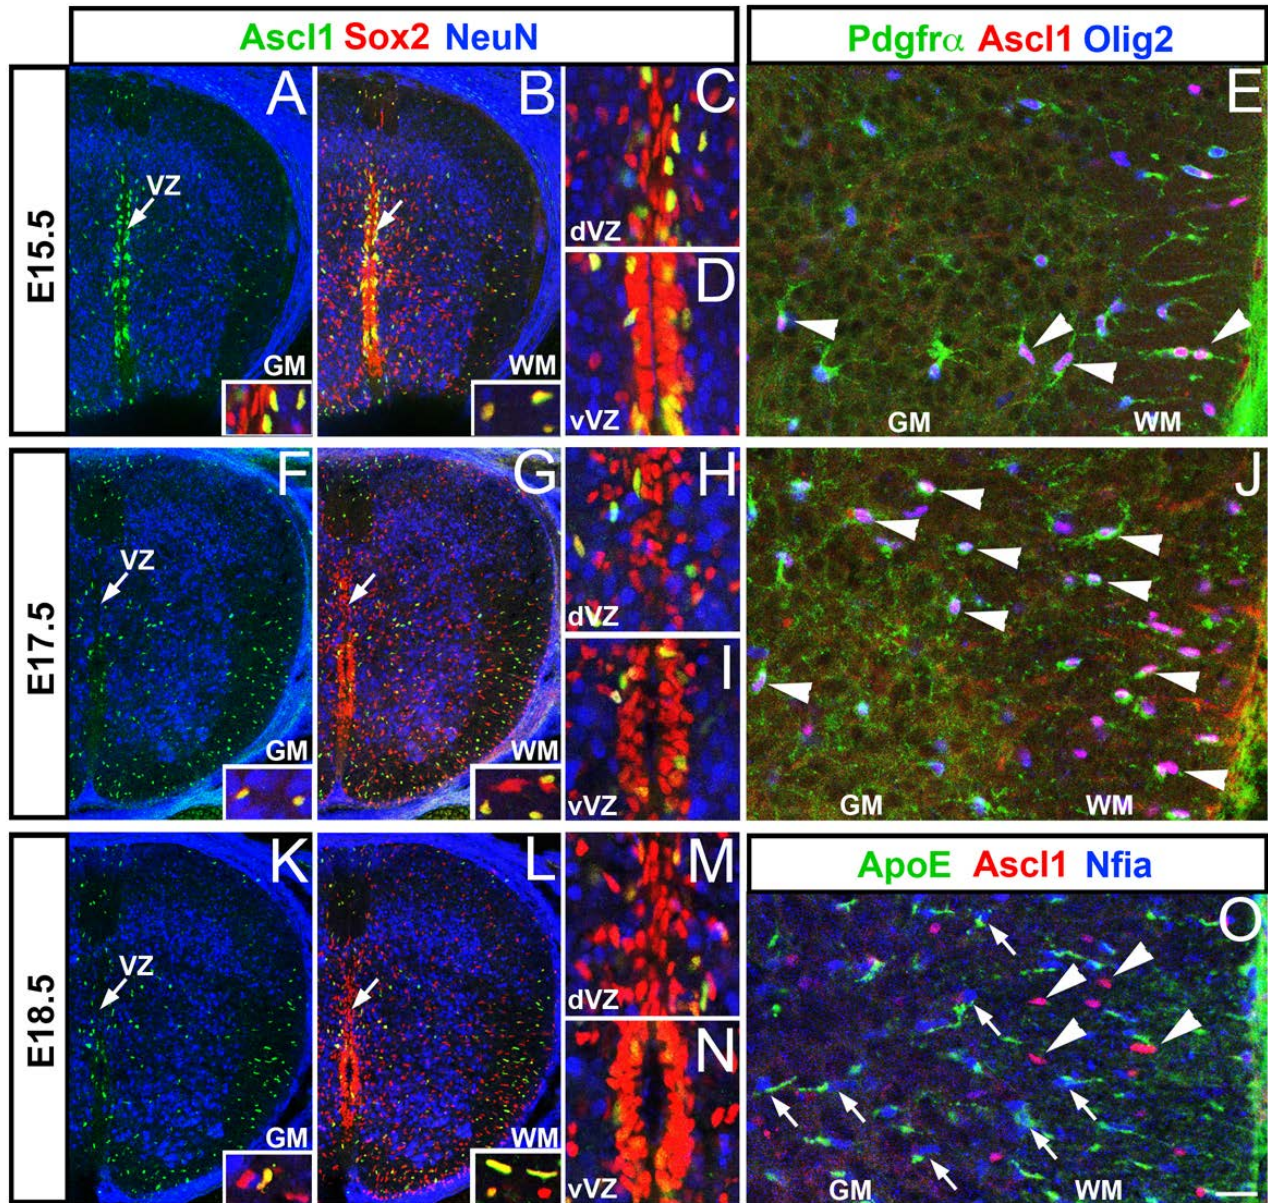

### Figure S1. Temporal expression of *Ascl1* during gliogenesis in the spinal cord

Immunofluorescence for *Ascl1* and glial cell markers on E15.5, E17.5, and E18.5 thoracic spinal cord sections. **(A-E)** At E15.5, *Ascl1* is expressed in a single cell layer lining the lateral edge of the VZ (A-D), as well as in Sox2<sup>+</sup> (insets, A,B) and Olig2<sup>+</sup>;Pdgfra<sup>+</sup> OPCs (arrowheads, E) in the GM and WM. **(F-O)** By E17.5 and E18.5, *Ascl1* is expressed in very few cells in the VZ (H,I,M,N) and in Sox2<sup>+</sup> (insets, F,G,K,L) and Olig2<sup>+</sup>;Pdgfra<sup>+</sup> OPCs (arrowheads, J) in the GM and WM, but it is not expressed in Nfia<sup>+</sup>;ApoE<sup>+</sup> IAPs (arrows, O). Note that *Ascl1*<sup>+</sup>;Nfia<sup>+</sup> is ApoE<sup>-</sup> (arrowheads, O). Scale bar is 100µm for A,B,F,G,K,L, and 25µm for all others.

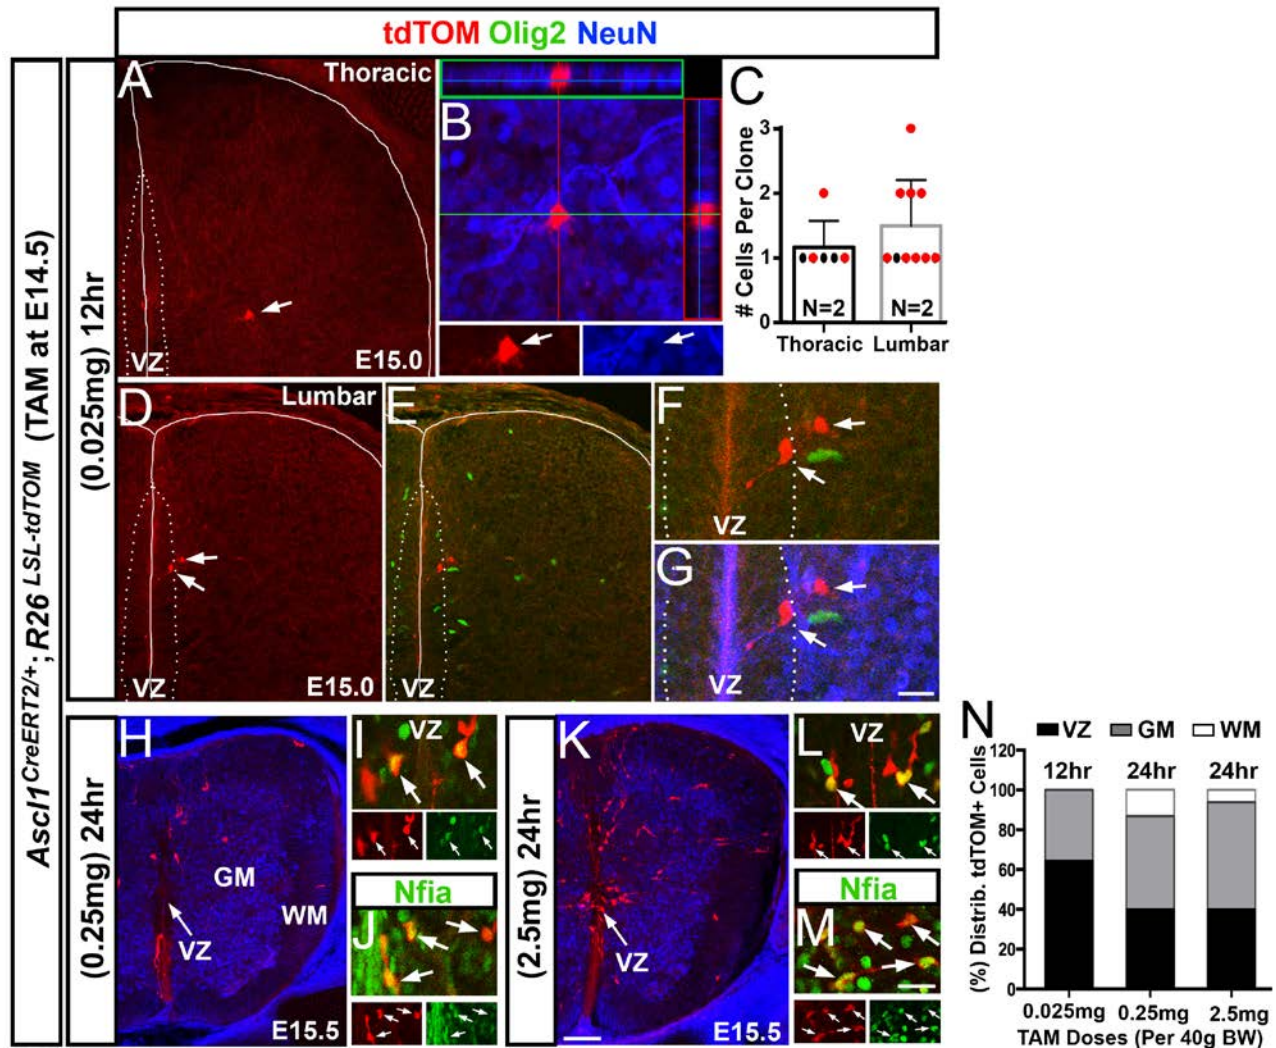

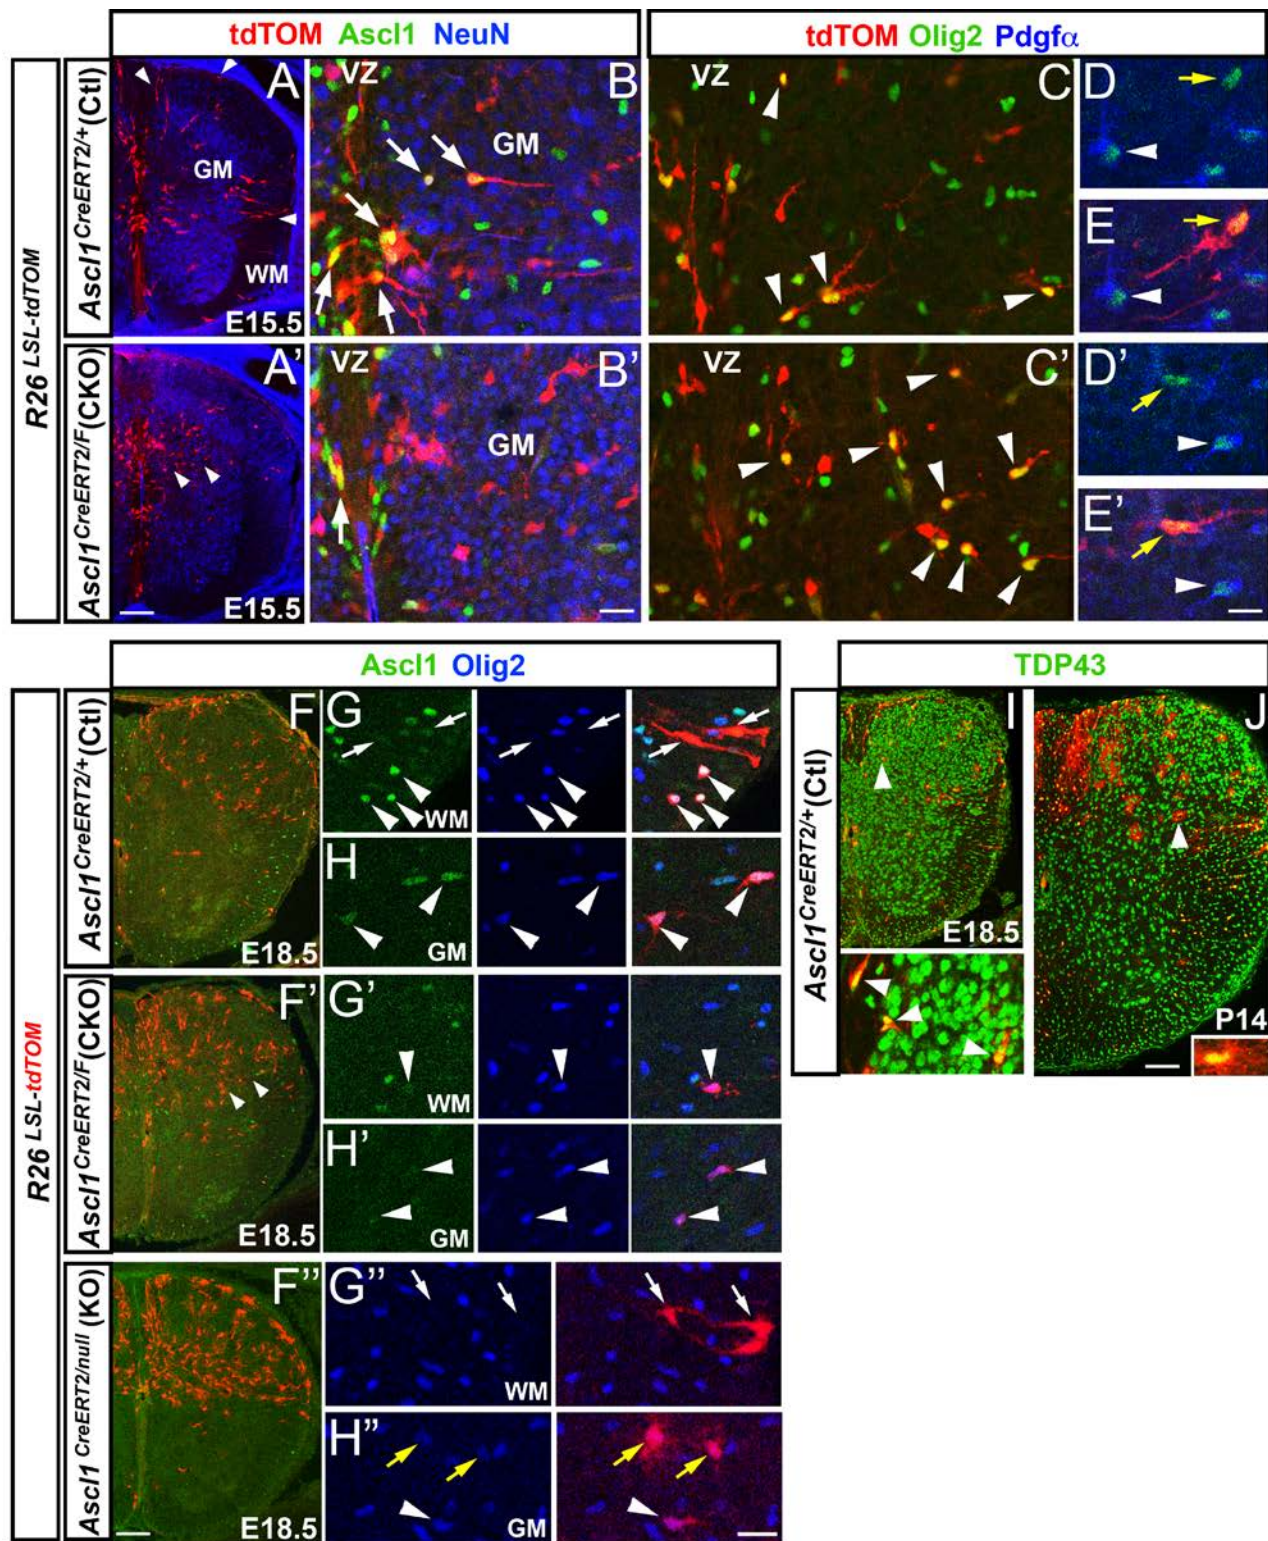

**Figure S3. *Ascl1*<sup>CreERT2</sup> efficiently deletes the *Ascl1*<sup>FL</sup> allele during gliogenesis in the spinal cord.**

Immunofluorescence on E15.5 (A-E, A'-E'), E18.5 (F-I, F'-H', F''-H'') and P14 (J) thoracic spinal cord sections of *Ascl1*<sup>CreERT2/+</sup>; *R26*<sup>LSL-tdTOM</sup> control, *Ascl1*<sup>CreERT2/FL</sup>; *R26*<sup>LSL-tdTOM</sup> CKO, or *Ascl1*<sup>CreERT2/null</sup>; *R26*<sup>LSL-tdTOM</sup> KO mice treated with tamoxifen at E14.5. (A-E) E15.5 control spinal

cord showing tdTOM+ (via anti-dsRed) cells in the VZ, GM, and WM (arrowheads, A). Some tdTOM+ cells in the VZ and GM continue to express *Ascl1* (arrows, B) and *Olig2* but are negative for *Pdgfra* (yellow arrow, D,E), whereas surrounding *Olig2*+ (tdTOM-) cells are *Pdgfra*+ (arrowheads, D,E). **(A'-E')** E15.5 *Ascl1* CKO spinal cord showing tdTOM+ cells in the VZ and medial GM (arrowheads, A'), the majority of which no longer express *Ascl1*, indicating a successful deletion of the *Ascl1<sup>Ff</sup>* allele. The number of tdTOM+ cells that are *Olig2*+; *Pdgfra*- are also increased in the GM (arrowheads C and yellow arrows D,E). **(F-H)** E18.5 control spinal cords showing *Ascl1* continues to be expressed in *Olig2*+;tdTOM+ cells in the GM and WM (arrowheads, F,H) **(F'-H')** *Ascl1* expression is no longer detected in *Olig2*+;tdTOM+ cells in the GM and WM of *Ascl1* CKO (arrowheads, F',G'). **(F''-H'')** E18.5 *Ascl1* KO spinal cord showing the presence of *Olig2*+;tdTOM+ cells with astrocyte morphology in the GM (yellow arrows, H'') but no *Olig2*+;tdTOM+ cells in the WM (F'',G''). **(I-J)** Co-localization of TDP43 (a pan nuclear marker) and tdTOM was used for quantifying the total number of tdTOM+ labeled cells (insets). Scale bar is 100µm for A,A',F'-F'',I,J; 25µm for B,B',C,C',G-G'',H-H'', and 16.6µm for D,D',E,E', and insets in I,J.

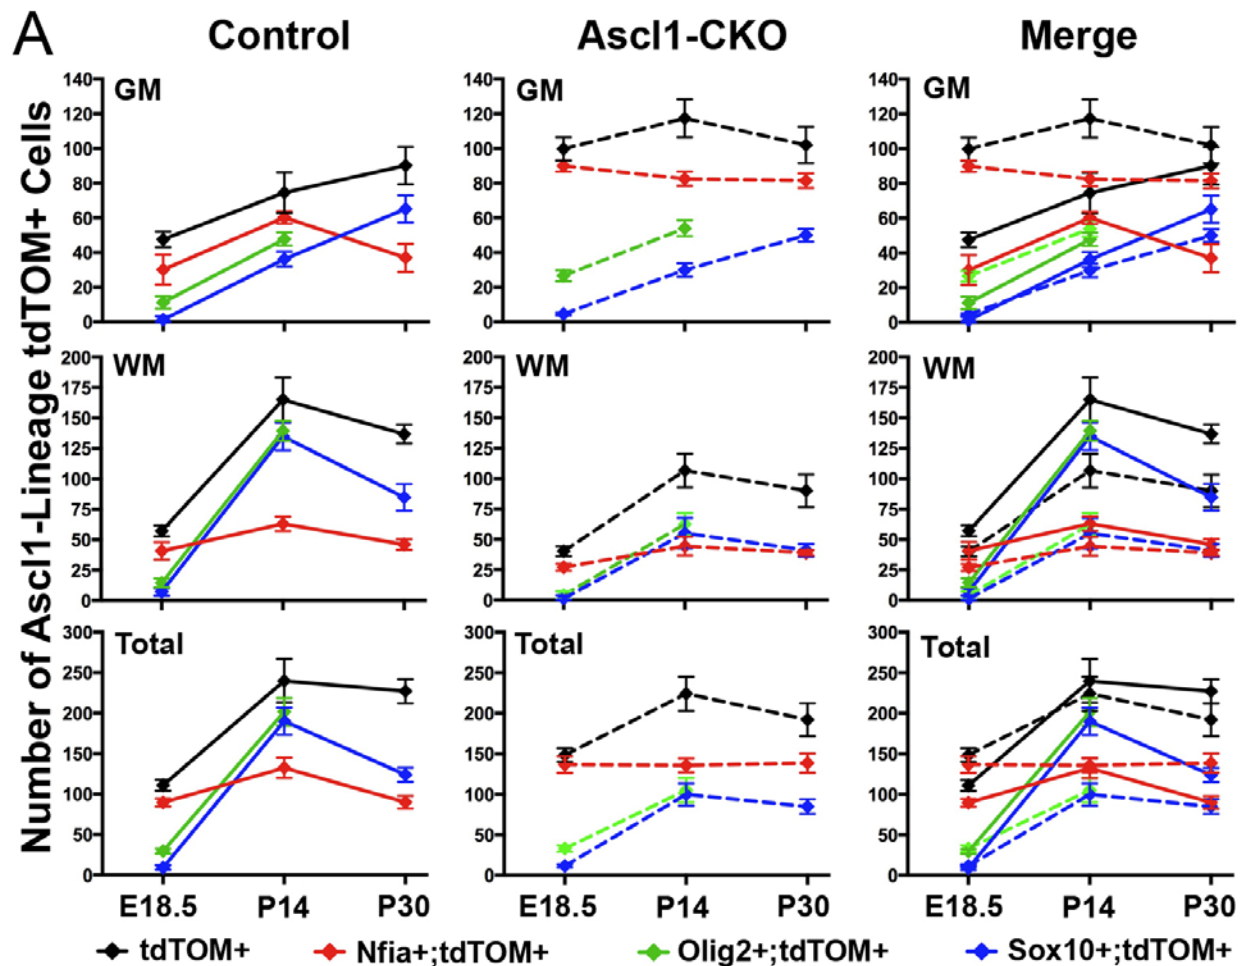

**B**

(%) Distrib. Ascl1-Lineage tdTOM+ Cells

|     | % tdTOM+ |        | % Sox10+;tdTOM+ |         | % Nfia+;tdTOM+ |        |          |
|-----|----------|--------|-----------------|---------|----------------|--------|----------|
|     | Ctl      | CKO    | Ctl             | CKO     | Ctl            | CKO    |          |
| P14 | GM       | 33 ± 5 | 54 ± 6*         | 14 ± 4  | 13 ± 5         | 22 ± 4 | 35 ± 5*  |
|     | WM       | 67 ± 5 | 46 ± 6*         | 52 ± 11 | 24 ± 9*        | 25 ± 6 | 19 ± 6   |
| P30 | GM       | 40 ± 6 | 52 ± 6          | 20 ± 7  | 18 ± 6         | 23 ± 4 | 46 ± 11* |
|     | WM       | 60 ± 6 | 48 ± 6          | 39 ± 7  | 20 ± 9*        | 20 ± 5 | 19 ± 5   |

(%) average ± SD =  $\left( \frac{\# \text{ marker+;tdTOM+ Cells}}{\text{Total tdTOM+ Cells}} \right)$  \*p<0.05

**Figure S4. Number and ratio of Ascl1-lineage glial cells in the GM and WM of control and *Ascl1*-CKO spinal cords**

Number (A) and distribution (B) of total tdTOM+ cells for astrocyte (Nfia+;tdTOM+) and oligodendrocyte (Olig2+;tdTOM+ and Sox10+;tdTOM+) lineage cells in the GM and WM of thoracic spinal cord of control and *Ascl1* CKO at E18.5, P14, and P30. Statistical analysis was performed using Student's *t*-test. Error bars are mean ± SD.

**Table S1. Source and dilution of antibodies**

| <b>Primary Antibodies</b>  | <b>Source &amp; Catalogue Number</b>      | <b>Dilution</b> |
|----------------------------|-------------------------------------------|-----------------|
| Chicken Anti-GFP           | Chemicon, AB16901                         | 1:500           |
| Goat Anti-Adolase C        | Santa Cruz Biotechnology, (D-14):SC-12066 | 1:100           |
| Goat Anti-Apolipoprotein E | Chemicon, AB947                           | 1:2,000         |
| Goat Anti-Sox10            | R&D Systems, AF2864                       | 1:20            |
| Guinea Pig Anti-Ascl1      | Kim et al., 2008, TX518                   | 1:10,000        |
| Guinea Pig Anti-Olig2      | Wichterle et al., 2002                    | 1:5,000         |
| Mouse Anti-CC1 (or APC)    | Calbiochem, OP80                          | 1:100           |
| Mouse Anti-GFAP            | Sigma, G3893                              | 1:500           |
| Mouse Anti-NeuN            | Chemicon, MAB377                          | 1:1,000         |
| Rabbit Anti-dsRed          | Clontech, 632496                          | 1:500           |
| Rabbit Anti-NFIA           | Dr. B. Deneen, Baylor College of Medicine | 1:5,000         |
| Rabbit Anti-Olig2          | Millipore, AB9610                         | 1:1,000         |
| Rabbit Anti-RFP Booster    | Chromotek, Atto594ts                      | 1:500           |
| Rabbit Anti-Sox2           | Millipore, AB5603                         | 1:1,000         |
| Rabbit Anti-TDP43          | Dr. G. Yu, UTSW Medical Center            | 1:5,000         |
| Rat Anti-PDGFRa (APA5)     | BD Pharmigen, 558774                      | 1:100           |
